1 Title: Previous estradiol treatment during midlife maintains transcriptional regulation of memory-  
2 related proteins by ER $\alpha$  in the hippocampus in a rat model of menopause.

3 Authors: Nina E. Baumgartner<sup>1,2</sup>, Katelyn L. Black<sup>1,2</sup>, Shannon M. McQuillen<sup>1,2</sup>, Jill M. Daniel<sup>1,2,3</sup>

4 Authors' Affiliations: <sup>1</sup> Brain Institute, Tulane University; <sup>2</sup> Neuroscience Program, Tulane  
5 University; <sup>3</sup> Psychology Program, Tulane University, New Orleans, Louisiana, 70118.

6 Authors' Contributions: Conceptualization and experiment planning by NEB, KLB, and JMD.

7 Data collection and analysis by NEB and SMM. Writing by NEB and JMD.

8 Corresponding author: Nina E. Baumgartner, [nbaumgar@tulane.edu](mailto:nbaumgar@tulane.edu), 200 Flower Hall, Tulane  
9 University, New Orleans, LA 70118.

10 Declaration of interests: none.

11 Funding: This work was supported by the National Institute on Aging under Grant

12 RF1AG041374.

13 Keywords: Estrogen, estrogen receptor, hippocampus, menopause, BDNF, ChAT

14 **Abstract:**

15 Previous midlife estradiol treatment, like continuous treatment, improves memory and results in  
16 lasting increases in hippocampal levels of estrogen receptor (ER)  $\alpha$  and ER-dependent  
17 transcription in ovariectomized rodents. We hypothesized that previous and continuous midlife  
18 estradiol act to specifically increase levels of nuclear ER $\alpha$ , resulting in transcriptional regulation  
19 of proteins that mediate estrogen effects on memory. Ovariectomized middle-aged rats received  
20 estradiol or vehicle capsule implants. After 40 days, rats initially receiving vehicle received  
21 another vehicle capsule (Vehicle). Rats initially receiving estradiol received either another  
22 estradiol (Continuous Estradiol) or a vehicle (Previous Estradiol) capsule. One month later,  
23 hippocampal genes and proteins were analyzed. Continuous and previous estradiol increased  
24 levels of nuclear, but not membrane or cytosolic ER $\alpha$  and had no effect on *Esr1*. Continuous  
25 and previous estradiol impacted gene expression and/or protein levels of mediators of  
26 estrogenic action on memory including ChAT, BDNF, and PSD-95. Findings demonstrate a  
27 long-lasting role for hippocampal ER $\alpha$  as a transcriptional regulator of memory following  
28 termination of previous estradiol treatment in a rat model of menopause.

29

## 30 **1. Introduction**

31 Decades of research support the idea that estrogens play an important role in  
32 modulating memory in the aging female brain (Koebele and Bimonte-Nelson, 2017; Luine and  
33 Frankfurt, 2020). Declines in ovarian hormones following menopause coincide with increased  
34 risk of pathological and non-pathological cognitive decline. Estrogens administered near the  
35 onset of loss of ovarian function have been shown to improve cognition in humans and rodents  
36 and enhance function of the hippocampus, a brain region crucial for memory (Daniel et al.,  
37 2015; Maki et al., 2011). However, due to serious health risks of long-term estrogen use (Chen  
38 et al., 2006), current guidelines recommend that individuals who do choose to use estrogens to  
39 treat menopause symptoms do so for only a few years near menopause (Santen et al., 2010).

40 In an aging ovariectomized rodent model of menopause, our lab has shown that short-  
41 term estrogen use during midlife has lasting effects on the brain and cognition. Forty days of  
42 estradiol exposure immediately following midlife ovariectomy resulted in enhanced performance  
43 on the hippocampal-dependent radial arm maze up to seven months after estradiol treatment  
44 had been ended, effects that were comparable to ongoing estradiol treatment (Rodgers et al.,  
45 2010). This initial finding in our lab demonstrated that estrogens administered for a short-term  
46 period immediately after the loss of ovarian function can have lasting benefits for memory  
47 similar to those exerted by ongoing estradiol exposure. Since then, we have replicated this  
48 lasting impact of previous exposure to midlife estradiol on memory in rats (Black et al., 2018;  
49 Black et al., 2016; Witty et al., 2013) and in mice (Pollard et al., 2018). Evidence in nonhuman  
50 primates receiving short-term estrogen use in midlife shows similar results. Ovariectomized  
51 rhesus monkeys that received 11 months of cyclic estradiol injections displayed enhanced  
52 performance on a memory task one year after termination of hormone treatment (Baxter et al.,  
53 2018). Finally, in women who undergo surgical menopause (oophorectomy) earlier in life than  
54 natural menopause, estrogen treatment until the time at which natural menopause would occur  
55 is recommended and is associated with decreased risk of cognitive impairment later in life (Bove

56 et al., 2014; Rocca et al., 2014). Collectively, these studies demonstrate across multiple species  
57 that exposure to estrogens immediately following loss of ovarian function can improve cognition  
58 long after hormone treatment has ended.

59         The ability of previous midlife estradiol exposure to enhance cognitive aging long-term is  
60 related to its ability to impact levels of estrogen receptors in the hippocampus. Estrogens exert  
61 their effects on the brain by acting on estrogen receptors, including the classic nuclear steroid  
62 receptor estrogen receptors (ER)  $\alpha$ . Previous midlife estradiol exposure resulted in lasting  
63 increases in hippocampal levels of ER $\alpha$  eight months after termination of estradiol treatment  
64 (Rodgers et al., 2010). Subsequent work in our lab and others suggest a causal relationship  
65 between increased hippocampal ER $\alpha$  and memory. For instance, increasing hippocampal ER $\alpha$   
66 using lenti-viral vectors enhances performance on the radial arm maze in aged ovariectomized  
67 rats (Witty et al., 2012). Additionally, pharmacologically antagonizing ER $\alpha$  using ICI 182780  
68 prevents the memory benefits shown previously with our short-term estradiol model in aged  
69 ovariectomized rats (Black et al., 2016). Finally, certain polymorphisms in *Esr1*, the gene that  
70 encodes for ER $\alpha$ , may impact cognitive function (Ma et al., 2014; Yaffe et al., 2009) and  
71 increase risk of Alzheimer's disease in postmenopausal women (Ma et al., 2009; Ryan et al.,  
72 2014), demonstrating that ER $\alpha$  can impact memory long after cessation of ovarian function.

73         Sustained increases in hippocampal ER $\alpha$  levels following previous midlife estradiol  
74 exposure can have long-lasting impacts on hippocampal function. Activation of ER $\alpha$  can lead to  
75 a wide range of changes within a cell, but its actions are often classified into two categories:  
76 genomic and nongenomic. The genomic actions of ER $\alpha$  are the classic steroid hormone  
77 receptor actions that involve the receptor acting as a transcription factor at estrogen response  
78 elements (EREs) to promote genomic changes within a cell (Klinge, 2001). Consistent with the  
79 observed impacts on hippocampal memory, we have also shown that previous exposure to  
80 estradiol following ovariectomy results in lasting increases in ERE-dependent transcriptional  
81 activity in the hippocampi of ovariectomized ERE-luciferase reporter mice (Pollard et al., 2018).

82 Currently, it remains unknown which specific ERE-dependent genes are impacted by previous  
83 midlife estradiol exposure that could be involved with the effects of this hormone treatment  
84 paradigm on memory. Three potential genes that contain an ERE sequence and are known to  
85 regulate memory include *Esr1* (Castles et al., 1997), *Bdnf* (Sohrabji et al., 1995), and *Chat*  
86 (Hyder et al., 1999). Whereas *Esr1* is the gene that transcribes ER $\alpha$ , the proteins transcribed  
87 by both *Bdnf* and *Chat* are closely associated with the effects of ER $\alpha$  on hippocampal function  
88 (Kőszegi et al., 2011; Scharfman and MacLuskey, 2005). Brain-derived neurotrophic factor  
89 (BDNF) is involved in hippocampal neurogenesis and neuroprotection in the aging brain  
90 (Pencea et al., 2001; Sohrabji and Lewis, 2006). Choline acetyltransferase (ChAT) is the  
91 synthesizing enzyme for acetylcholine, a neurotransmitter closely associated with the actions of  
92 estrogen in the hippocampus (Gibbs, 1997; Luine, 1985).

93 In addition to traditional genomic actions associated with nuclear steroid receptors,  
94 membrane localized ER $\alpha$  is also able to impact memory in the hippocampus by acting through  
95 rapid nongenomic mechanisms. Membrane ER $\alpha$  has been shown to rapidly activate multiple  
96 intracellular signaling pathways that influence hippocampal dependent cognition [for review, see  
97 (Foster, 2012)]. Rapid effects of estradiol administration on cellular signaling pathways has  
98 been implicated in synaptic transmission (Fugger et al., 2001), cell excitability (Kumar and  
99 Foster, 2002), NMDA receptor function (Bi et al., 2003), long-term potentiation (Foy et al.,  
100 2008), and rapid changes in expression of synaptic proteins including postsynaptic density  
101 protein 95 (PSD-95), a protein crucial for stabilizing synaptic changes during long-term  
102 potentiation (Akama and McEwen, 2003; Murakami et al., 2015). Because these different  
103 actions of ER $\alpha$  are associated with specific locations of the receptor, the subcellular distribution  
104 of ER $\alpha$  dictates its function. Currently, it is unknown where the observed increase in ER $\alpha$   
105 following previous midlife estradiol exposure occurs within hippocampal cells.

106 The overall goal of the current work was to determine mechanisms by which previous  
107 exposure to estradiol in midlife, acting through its ability to increase levels of ER $\alpha$ , is able to

108 maintain hippocampal function. To do so we compared impacts of previous estradiol treatment  
109 to ongoing estradiol and ovariectomized control treatments on hippocampal gene and protein  
110 expression of estrogen-sensitive genes and on the subcellular distribution of hippocampal ER $\alpha$   
111 protein levels. Specifically, we measured gene expression and corresponding protein levels of  
112 three estrogen-sensitive genes that contain ERE sequences (*Esr1*/ER $\alpha$ , *Bdnf*/BDNF,  
113 *Chat*/ChAT) and one estrogen-sensitive gene without a known ERE sequence but associated  
114 with the actions of membrane-bound ER $\alpha$  (*Dlg4*/PSD-95). Subcellular fractionation was  
115 performed before measuring ER $\alpha$  protein levels in order to determine the subcellular localization  
116 of the receptor in hippocampal cells following previous exposure to estradiol in midlife.

## 117 **2. Materials and Methods**

### 118 *2.1 Subjects*

119 Middle-aged female Long-Evans hooded rats, retired breeders (~11 months of age),  
120 were purchased from Envigo. Animal care was in accordance with guidelines set by the National  
121 Institute of Health Guide for the Care and Use of Laboratory Animals (2011) and the Institutional  
122 Animal Care and Use Committees of Tulane University approved all procedures. Rats were  
123 housed individually in a temperature-controlled vivarium under a 12-h light, 12-h dark cycle and  
124 had unrestricted access to food and water.

### 125 *2.2 Ovariectomy and hormone treatment*

126 Rats were anesthetized by intraperitoneal injections of ketamine (100 mg/kg ip; Bristol  
127 Laboratories, Syracuse, NY) and xylazine (7 mg/kg ip; Miles Laboratories, Shawnee, KS) and  
128 were ovariectomized. Buprenorphine (0.375 mg/kg; Reckitt Benckiser Health Care) was  
129 administered by subcutaneous injection before surgery. Ovariectomy surgery involved bilateral  
130 flank incisions through skin and muscle wall and removal of ovaries. Immediately following  
131 ovariectomy, rats were implanted with a subcutaneous 5-mm SILASTIC brand capsule (0.058  
132 in. inner diameter and 0.077 in. outer diameter; Dow Corning, Midland, MI) on the dorsal aspect

133 of their necks. Capsules contained either vehicle or 25% 17 $\beta$ -estradiol (Sigma-Aldrich, St. Louis,  
134 MO) diluted in vehicle. We have previously shown that implants of these dimensions and  
135 estradiol concentrations maintain blood serum estradiol levels in middle-age retired breeders at  
136 approximately 37 pg/mL (Bohacek and Daniel, 2007), which falls within physiological range.

### 137 *2.3 Hormone capsule replacement*

138 Forty days after ovariectomy and capsule implantation, rats were anesthetized with  
139 ketamine and xylazine and capsules were removed and replaced with a new capsule.  
140 Buprenorphine was administered by subcutaneous injection before the start of each surgery.  
141 Rats initially receiving vehicle capsules received another vehicle capsule (Vehicle group). Rats  
142 initially receiving estradiol capsules either received a new estradiol capsule (Continuous  
143 Estradiol group) or instead received a vehicle capsule (Previous Estradiol group).

### 144 *2.4 Euthanasia and tissue collection*

145 Approximately 30 days following capsule replacement surgeries, rats were killed under  
146 anesthesia induced by ketamine and xylazine. Hippocampus were dissected and either quick  
147 frozen on dry ice for processing for western blotting or placed into tubes containing RNAlater  
148 (Qiagen; Hilden, Germany) for RNA extraction and stored at -80°C until further processing.

### 149 *2.5 Hormone treatment verification*

150 Vaginal smears for each rat were collected for at least four consecutive days before  
151 capsule replacement in order to confirm hormone treatment for the initial forty-day window.  
152 Smears of ovariectomized, cholesterol-treated rats were characterized by a predominance of  
153 leukocytes, while smears of ovariectomized, estradiol-treated rats were characterized by a  
154 predominance of cornified and nucleated epithelial cells indicating hormone treatment was  
155 effective. At the time of euthanasia, a 1-cm sample of the right uterine horn was collected from  
156 each rat and weighed to verify hormone treatment during the latter part of the experiment.

### 157 *2.6 Subcellular protein fractionation*

158 Hippocampal tissue from each of the hormone treatment groups (Vehicle, n=10;  
159 Continuous Estradiol, n=10; Previous Estradiol, n=10) was lysed in cytosolic extraction buffer  
160 and protease inhibitors included in the Sub-Cellular Protein Fractionation Kit for Tissues  
161 (Thermo Scientific, Waltham, MA) using the PowerGen 125 handheld homogenizer (Fisher  
162 Scientific, San Jose, CA). Homogenate was centrifuged through the Pierce Tissue Strainer at  
163 500 x g for 5 minutes at 4°C. Supernatant containing the cytosolic compartment extract was  
164 transferred immediately to a clean tube. The pellet was resuspended by vortexing in membrane  
165 extraction buffer containing protease inhibitors then incubated at 4°C for 10 minutes with gentle  
166 mixing. Sample was centrifuged at 3000 x g for 5 minutes at 4°C. Supernatant containing the  
167 membrane compartment extract was transferred immediately to a clean tube. The pellet was  
168 resuspended by vortexing in nuclear extraction buffer and protease inhibitors then incubated at  
169 4°C for 30 minutes with gentle mixing. The sample was then centrifuged at 5000 x g for 5  
170 minutes at 4°C. Supernatant containing the nuclear soluble extract was transferred to a clean  
171 tube. The pellet was resuspended by vortexing in chromatin bound extraction buffer containing  
172 room temperature nuclear extraction buffer with protease inhibitors, 100mM CaCl<sub>2</sub>, and  
173 Micrococcal Nuclease, then incubated at 37°C for 15 minutes. The sample was then centrifuged  
174 at 16,000 x g for 5 minutes at 4°C. Supernatant containing the chromatin bound extract was  
175 added to the previously obtained nuclear soluble extract to constitute the nuclear compartment  
176 extract. Protein concentration was determined for the cytosolic, membrane, and nuclear  
177 fractions of each sample using the Bradford Protein Assay (Thermo Scientific). Each  
178 compartment of each sample was diluted 1:1 in Laemlli Sample Buffer (BioRad, Hercules, CA)  
179 mixed with 350mM DTT (Sigma-Aldrich) and boiled for 5 minutes. One cytosolic and one  
180 membrane sample from the Vehicle group, one membrane and two nuclear samples from the  
181 Continuous Estradiol group, and one cytosolic sample from the Previous Estradiol group were  
182 excluded from western blotting either due to compartmental contamination or low protein yield.



183 *2.7 Subcellular compartment western blotting*

184 For each cytosolic, membrane, and nuclear tissue from each sample, 15ug of protein  
185 were loaded onto and separated on a 7.5% TGX SDS-PAGE gel at 250 V for 40 minutes.  
186 Molecular weight markers (PageRuler, Thermo Scientific) were included with each run. Proteins  
187 were transferred from gels to nitrocellulose membranes at 100 V for 30 minutes. Membranes  
188 were blocked with 5% nonfat dry milk in 1% Tween 20/1 Tris-buffered saline (TTBS) with gentle  
189 mixing at room temperature for 1 hour. After blocking, membranes were incubated with gentle  
190 mixing in primary antibody overnight at 4°C in 1% nonfat dry milk-TTBS. Samples from  
191 cytosolic, membrane, and nuclear compartments were incubated with antibodies for ER $\alpha$   
192 (mouse monoclonal, Santa Cruz; 1:750). Samples from cytosolic fractions were incubated with  
193 antibodies for cytosolic loading control Enolase (1:2000, Santa Cruz). Samples from membrane  
194 fractions were incubated with antibodies for membrane loading control ATP1A1 (1:5000,  
195 ProteinTech). Samples from nuclear fractions were incubated with antibodies for nuclear loading  
196 control CREB (1:2000, Cell Signaling). Following primary antibody incubation, blots were  
197 washed three times for 15 minutes with TTBS. Blots were then incubated with secondary  
198 antibodies conjugated to HRP in 5% NFDM-TTBS for one hour at room temperature with gentle  
199 mixing. Secondary antibodies used were Goat Anti-Mouse IgG (1:50,000 for ER $\alpha$ , BioRad) and  
200 Goat-Anti Rabbit IgG (1:10,000 for enolase, ATP1A1, and CREB; Santa Cruz). Following  
201 secondary antibody incubation, blots were washed three times for 15 minutes with TTBS. Blots  
202 were then incubated with the chemiluminescent substrate Supersignal West Femto (Fischer  
203 Scientific) for 5 minutes and exposed to film (Kodak) for varying times to capture optimal signal  
204 intensity. Films were imaged using MCID Core imaging software (InterFocus Imaging Ltd.,  
205 Cambridge, England), and optical density was measured for bands of interest. Values for each  
206 sample represent the percentage of ER $\alpha$  expression relative to the compartment-specific  
207 loading control normalized to the mean vehicle values.

## 208 2.8 RNA extraction

209 Hippocampal tissue from each of the hormone treatment groups (Vehicle, n=11;  
210 Continuous Estradiol, n=11; Previous Estradiol, n=10) was homogenized using the PowerGen  
211 125 handheld homogenizer in QIAzol Lysis Reagent (Qiagen) and extracted using the RNeasy  
212 Plus Universal Mini Kit (Qiagen). Briefly, lysate was incubated with chloroform and the aqueous  
213 phase was then incubated with ethanol. Sample was then centrifuged and washed in a spin  
214 column. RNA was eluted using Rnase-free water. A gDNA eliminator was used to reduce  
215 genomic DNA contamination. RNA quality and concentration were determined by gel  
216 electrophoresis and UV absorption.

## 217 2.9 RT-PCR

218 RNA was quantified using the QuantiFast SYBR Green RT-PCR Kit (Qiagen). Primers  
219 used were for *Esr1* (QuantiTect Primer Assays; Qiagen), *Chat*, *Bdnf*, *Dlg4* and the  
220 housekeeping gene, *Gapdh* (QuantiTect Primer Assays; Qiagen). All samples were run in  
221 triplicate. Reverse transcription was performed at 50°C for 10 min to generate cDNA in a 25 µL  
222 reaction volume with 50 µg total RNA. HotStarTaq Plus DNA Polymerase was activated and  
223 reverse transcription was ended by 5 min of incubation at 95°C. Following the initial activation  
224 step, 40 cycles of 2-step cycling consisting of denaturation for 10 s at 95°C and combined  
225 annealing/extension for 30 s at 60°C were repeated. Melting curves were observed to confirm  
226 the correct primer usage in each well. Values analyzed represent a mean of triplicates  
227 normalized as a percentage of the values for the housekeeping gene, *Gapdh*.

## 228 2.10 Whole cell tissue processing

229 Hippocampal tissue from each of the hormone treatment groups (Vehicle, n=8;  
230 Continuous Estradiol, n=8; Previous Estradiol, n=10) were homogenized in 10 µl/mg lysis buffer  
231 containing 1 mM EGTA, 1 mM EDTA, 20 mM Tris, 1 mM sodium pyrophosphate tetrabasic  
232 decahydrate, 4 mM 4-nitrophenyl phosphate disodium salt hexahydrate, 0.1 µM microcystin,

233 and 1% protease inhibitor cocktail (Sigma-Aldrich). Samples were then centrifuged for 15 min at  
234 1000 x g at 4°C. Protein concentration of supernatant determined via Bradford Protein Assay.  
235 Each sample diluted 1:1 with Laemmli Sample Buffer (BioRad) mixed with 350 mM DTT, boiled  
236 for 10 min, and stored at -80°C until western blotting.

### 237 *2.11 Whole cell western blotting*

238 Twenty-five micrograms of protein were loaded onto a gel and western blotting was  
239 performed as described in section 2.7. Primary antibodies used include PSD-95 (Millipore,  
240 1:2000), BCL-2 (Santa Cruz, 1:2000), ChAT (Cell Signalling, 1:2000), BDNF (Santa Cruz,  
241 1:2000), and loading control protein  $\beta$ -actin (Santa Cruz, 1:5000). Secondary antibodies  
242 conjugated to HRP were used. Blots were then incubated with the chemiluminescent substrates  
243 Supersignal West Femto (PSD-95, BDNF, ChAT) for 5 minutes or ECL Standard ( $\beta$ -actin) for 1  
244 minute and then imaged using the ChemiDocMP Imaging System (BioRad). One sample from  
245 the Vehicle group was excluded from analysis for the BDNF western blot due to a transfer  
246 bubble over the band of interest for that sample. Optical density x area was measured for bands  
247 of interest using MCID Imaging software. Data for each band of interest were normalized to  
248 expression of loading control protein  $\beta$ -actin.

### 249 *2.12 Statistical analyses*

250 Data were analyzed by One-Way ANOVA comparing treatment group and subsequent  
251 LSD post-hoc testing as appropriate. Researchers were blind to treatment group during western  
252 blotting, RT-PCR and data analysis. All data analyses were performed using SPSS software.

## 253 **3. Results**

### 254 *3.1 Transcriptional regulation of *Esr1* following continuous or previous estradiol exposure in the* 255 *hippocampus of aging ovariectomized rats*

256 As shown in Figure 1A, there was no effect of hormone treatment on hippocampal  
257 expression of *Esr1* ( $F(2,31)=0.422$ ,  $p=0.660$ ). These data suggest that elevated hippocampal

258 ER $\alpha$  protein levels following continuous and previous estradiol exposure (Rodgers et al. 2010;  
259 Witty et al. 2013) during midlife are not caused by changes in transcription levels in *Esr1*.

260 *3.2 Subcellular localization of ER $\alpha$  in the hippocampus of ovariectomized rats following*  
261 *continuous or previous exposure to estradiol in midlife*

262 Figure 2 displays verification of our subcellular compartment fractionation process of  
263 hippocampal tissue. Enolase—an enzyme involved in glycolysis—was used as a cytosolic  
264 marker and loading control, appearing predominately in the cytosolic fraction of samples.  
265 ATP1A1—a subunit of the sodium potassium pump ATPase—was used as a membrane marker  
266 and loading control, appearing predominately in the membrane fraction of samples. The  
267 transcription factor cAMP response element-binding protein (CREB) was used as a nuclear  
268 marker and loading control, appearing predominately in the nuclear fraction of samples.  
269 Verification of compartment fractionation was performed by western blotting for each of the  
270 compartment markers using a random selection of samples from each experimental group.

271 As illustrated in Figures 1B-C, there was no effect of hormone treatment on cytosolic  
272 ( $F(2,27)=0.727$ ,  $p=0.493$ ) or membrane ( $F(2,27)=0.763$ ,  $p=.477$ ) ER $\alpha$  levels. As illustrated in  
273 Figure 1D, there was an effect of hormone treatment on nuclear ER $\alpha$  levels ( $F(2,27)=3.396$ ,  
274  $p=0.0496$ ), with levels increased in both the Continuous Estradiol ( $p=0.033$ ) and Previous  
275 Estradiol ( $p=0.036$ ) groups as compared to Vehicle group levels. There was no significant  
276 difference in nuclear ER $\alpha$  levels between the Continuous Estradiol and Previous Estradiol  
277 groups ( $p=0.863$ ). These results demonstrate that previous exposure to estradiol in midlife  
278 results in lasting elevation specifically of nuclear ER $\alpha$  levels in the hippocampus of  
279 ovariectomized rats, similar to levels in animals receiving ongoing estradiol treatment.

280 *3.3 Hippocampal transcriptional regulation and protein expression of genes that contain ERE*  
281 *sequences following continuous or previous midlife estradiol exposure*

282 As illustrated in Figure 3A, there was an effect of hormone treatment on expression of  
283 *Bdnf* ( $F(2,31)=4.180$ ,  $p=0.025$ ), with increased RNA levels in both the Continuous Estradiol  
284 ( $p=0.011$ ) and Previous Estradiol ( $p=0.039$ ) groups as compared to the levels in the Vehicle  
285 group. No significant difference in RNA levels of *Bdnf* was found between the Continuous  
286 Estradiol and Previous Estradiol groups ( $p=0.621$ ). There was an effect of hormone treatment  
287 on hippocampal protein levels of BDNF (Figure 3B,  $F(2,24)=6.676$ ,  $p=0.005$ ), with levels in the  
288 Previous Estradiol group significantly increased as compared to those in both the Vehicle  
289 ( $p=0.023$ ) and the Continuous Estradiol ( $p=0.002$ ). No significant difference in protein levels of  
290 BDNF was found between the Vehicle and Continuous Estradiol groups ( $p=0.390$ ).

291 As illustrated in Figure 3C, there was an effect of hormone treatment on expression of  
292 *Chat* (Figure 2C,  $F(2,31)=4.810$ ,  $p=0.016$ ), with increased RNA levels in both the Continuous  
293 Estradiol ( $p=0.006$ ) and Previous Estradiol ( $p=0.035$ ) groups as compared to the levels in the  
294 Vehicle group. No significant difference in RNA levels of *Chat* was found between the  
295 Continuous Estradiol and Previous Estradiol groups ( $p=0.492$ ). There was an effect of hormone  
296 treatment on hippocampal protein levels of ChAT (Figure 3D,  $F(2,25)=5.944$ ,  $p=0.008$ ), with  
297 levels in the Continuous Estradiol ( $p=0.005$ ) and Previous Estradiol ( $p=0.007$ ) groups  
298 significantly increased as compared to those in the Vehicle group. No significant difference in  
299 ChAT protein levels of was found between the Continuous Estradiol and Previous Estradiol  
300 groups ( $p=0.770$ ).

### 301 *3.4 Hippocampal transcriptional regulation and protein expression of one gene that does not* 302 *contain an ERE sequence following continuous or previous midlife estradiol exposure*

303 As illustrated in Figure 4A, there was an effect of hormone treatment on expression of  
304 *Dlg4* ( $F(2,31)=3.812$ ,  $p=0.034$ ), with increased RNA levels in both the Continuous Estradiol  
305 ( $p=0.034$ ) and Previous Estradiol ( $p=0.018$ ) groups as compared to the levels in the Vehicle  
306 group. No significant difference in RNA levels of *Dlg4* was found between the Continuous

307 Estradiol and Previous Estradiol groups ( $p=0.731$ ). There was no effect of hormone treatment  
308 on hippocampal protein levels of PSD-95 ( $F(2,25)=0.088$ ,  $p=0.916$ ).

#### 309 **4. Discussion**

310 Results of the present studies reveal that previous exposure to estradiol during midlife  
311 has lasting impacts on hippocampal function through sustained transcriptional activity of ER $\alpha$   
312 that persists long after estradiol treatment has ended. Previous estradiol exposure resulted in  
313 lasting increases in the nuclear pool of hippocampal ER $\alpha$  as well as long-term upregulation of  
314 BDNF and ChAT in aging ovariectomized rats—effects that were similar to those observed in  
315 ovariectomized animals with ongoing estradiol exposure. Specifically, we showed that both  
316 continuous and previous estradiol increased nuclear ER $\alpha$  protein levels in the hippocampus of  
317 aging, ovariectomized rats one month after cessation of estradiol treatment. Animals from the  
318 Previous Estradiol group also had elevated hippocampal expression of two ERE-dependent  
319 genes (*Bdnf*, *Chat*) and their corresponding proteins (BDNF, ChAT), as well as elevated  
320 expression of one non-ERE-dependent gene (*Dlg4*), as compared to animals from the Vehicle  
321 group. Animals receiving ongoing estradiol exposure displayed similar, but not identical,  
322 expression patterns in the hippocampus, with elevated gene expression of *Bdnf*, *Chat*, and  
323 *Dlg4*, but only elevated protein levels of ChAT as compared to animals from the Vehicle group.  
324 Overall, these findings indicate a crucial role for ER $\alpha$  in maintaining hippocampal memory in  
325 ovariectomized animals through sustained transcriptional activity of the receptor following  
326 previous estradiol exposure in midlife in a pattern that is comparable to that observed in the  
327 presence of circulating estradiol.

328 Maintained hippocampal protein levels of ER $\alpha$  following continuous and previous  
329 estradiol exposure in ovariectomized rats has been associated with enhanced hippocampal-  
330 dependent memory (Rodgers et al., 2010). As a nuclear steroid hormone receptor, ER $\alpha$  can act  
331 in a variety of functions within a cell. Here we demonstrated through subcellular compartment

332 fractionation that ER $\alpha$  is specifically increased in the nuclear compartment of hippocampal cells  
333 following continuous or previous midlife estradiol exposure in ovariectomized rats, although the  
334 receptor is also present in the cytosol and membrane compartments in all hormone treatment  
335 groups. This finding aligns with recent work from our lab demonstrating that short-term estradiol  
336 treatment immediately after ovariectomy results in lasting enhancements in hippocampal-  
337 memory and increased ERE-dependent transcriptional activity in mice (Pollard et al., 2018).  
338 Together, it strengthens the connection between maintained protein levels of ER $\alpha$  following  
339 previous exposure to estradiol in midlife and enhanced memory via sustained transcriptional  
340 activity of ER $\alpha$  in the hippocampus.

341         The current results, in which we did not see estradiol-induced impacts on *Esr1*  
342 transcription levels, suggest that mechanisms by which previous estradiol treatment maintains  
343 levels of ER $\alpha$  in the hippocampus long after the termination of the treatment does not involve  
344 transcriptional regulation. Besides modification of ER $\alpha$  gene transcription, ER $\alpha$  levels can be  
345 impacted by changes in receptor degradation rate. ER $\alpha$  is degraded via the ubiquitin-  
346 proteasomal pathway (Tateishi et al., 2004). When the receptor is unliganded, the E3 ubiquitin  
347 ligase, C terminus of Hsc70-interacting protein (CHIP) binds ER $\alpha$  and targets it for ubiquitination  
348 and proteasomal degradation (Fan et al., 2005). Long-term estrogen deprivation following OVX  
349 increases interaction between CHIP and ER $\alpha$  and thus subsequent ubiquitination of ER $\alpha$   
350 (Zhang et al., 2011). Prior results from our lab indicate that previous estradiol treatment may  
351 prevent effects of estrogen deprivation on ER $\alpha$  degradation. The same 40 days of previous  
352 estradiol treatment used in the current study resulted in lasting decreased association between  
353 ER $\alpha$  and CHIP in parallel to increased protein levels of ER $\alpha$  when measured one month  
354 following termination of the previous estradiol treatment (Black et al., 2016). Together, these  
355 results with those of the current work provide support for the hypothesis that lasting changes in  
356 levels of ER $\alpha$  resulting from previous exposure to midlife estradiol are primarily due to lasting  
357 changes in protein degradation rather than transcription.

358           The ability of estradiol treatment to increase levels of ER $\alpha$  specifically in the nucleus is  
359 consistent with its ability to impact estradiol-sensitive genes and proteins. We found impacts of  
360 both continuous and previous estradiol treatments on hippocampal gene expression and protein  
361 levels in two ERE-dependent genes known to impact memory. Animals that had previously been  
362 exposed to estradiol following ovariectomy displayed upregulated expression of *Bdnf* and *Chat*  
363 in the hippocampus one month after termination of estradiol exposure. These increases in gene  
364 expression observed in the Previous Estradiol group were comparable to those found in the  
365 hippocampi of animals receiving ongoing estradiol exposure, demonstrating that short-term  
366 estradiol exposure during midlife can have lasting effects on hippocampal gene expression.  
367 There were, however, differences between the Continuous Estradiol and Previous Estradiol  
368 group in the expression patterns of the proteins associated with these genes.

369           Significant increases in hippocampal proteins levels of both BDNF and ChAT were found  
370 in the Previous Estradiol group, consistent with the observed increases in gene expression of  
371 *Bdnf* and *Chat* described above. These findings were also consistent with earlier findings from  
372 our lab that previous estradiol exposure during midlife results in lasting increases in levels of  
373 ChAT in the hippocampus (Rodgers et al., 2010; Witty et al., 2013) but which has not been  
374 shown before for hippocampal BDNF levels. In contrast to the effects observed in the Previous  
375 Estradiol group, animals in the Continuous Estradiol group showed significantly increased  
376 hippocampal protein levels of ChAT, but not BDNF, despite showing increased gene expression  
377 for both *Bdnf* and *Chat*. Several earlier studies have demonstrated that estradiol exposure  
378 increases *Chat* mRNA (Gibbs, 1996), elevates ChAT protein expression (Gibbs, 1997; Rodgers  
379 et al., 2010) and increases acetylcholine release in the hippocampus of ovariectomized rodents  
380 (Gabor et al., 2003; Gibbs, 1997). However, the relationship between estradiol exposure, *Bdnf*  
381 mRNA, and BDNF protein levels in ovariectomized animals is less clear. Consistent with our  
382 findings, several—but not all (Cavus and Duman, 2003)—studies found continuous estradiol  
383 treatment to increase hippocampal mRNA levels of *Bdnf* in ovariectomized animals (Berchtold



384 et al., 2001; Liu et al., 2001; Singh et al., 2005). There is however no clear consensus as to the  
385 effect of estradiol treatment on hippocampal BDNF protein levels, with some studies showing  
386 increased protein expression throughout the hippocampus (Berchtold et al., 2001), some  
387 showing increased BDNF levels only in specific subregions of the hippocampus (Zhou et al.,  
388 2005), and others showing decreased hippocampal protein levels in ovariectomized animals  
389 treated with estradiol (Gibbs, 1999). The results of the current studies therefore add to this  
390 complex story by demonstrating that previous exposure to estradiol during midlife results in  
391 lasting increases in hippocampal mRNA and protein expression of BDNF, whereas continuous  
392 exposure to estradiol only results in increased mRNA levels. Nevertheless, both hormone  
393 treatments result in lasting increases in mRNA and protein levels of ChAT, another ERE-  
394 dependent gene critical for memory. As described above regarding estrogenic regulation of *Esr1*  
395 mRNA, the relationship between estrogen receptor activity, mRNA expression, and protein  
396 levels can vary greatly due to brain region, age, and duration of estrogen exposure, among  
397 other variables (Scharfman and MacLuskey, 2005).

398 Finally, our findings demonstrate that continuous or previous estradiol exposure  
399 following ovariectomy can also result in increased transcription of non-ERE-dependent genes,  
400 with both the Continuous Estradiol and Previous Estradiol groups showing increased  
401 hippocampal expression of *Dlg4* as compared to the Vehicle group. Interestingly, there was no  
402 observed change in levels of PSD-95, the protein transcribed by *Dlg4*, in either hormone  
403 treatment group. Estradiol treatment has repeatedly been shown to increase protein levels of  
404 PSD-95 in the hippocampus (Nelson et al., 2014; Waters et al., 2009), a rapid effect that is  
405 attributed to the PI3K-Akt signaling pathway activated by membrane ER $\alpha$  (Akama and McEwen,  
406 2003; Murakami et al., 2015). Because we observed no change in membrane levels of ER $\alpha$   
407 following continuous or previous estradiol treatments, it is unclear how increased ER $\alpha$  in the  
408 nucleus of hippocampal cells can result in lasting changes in gene expression but not protein

409 levels of PSD-95. Future studies should investigate potential crosstalk between membrane and  
410 nuclear ER $\alpha$  and its impact on synaptic proteins following previous midlife estradiol exposure.

411 Together, the results of the present study indicate a critical role for ER $\alpha$  as a  
412 transcriptional regulator of hippocampal function in both the presence and absence of circulating  
413 estrogens. Previous exposure to estradiol in midlife results in lasting increases in nuclear ER $\alpha$   
414 activity in the hippocampus, resulting in increased transcription of genes important for  
415 hippocampal function and enhanced hippocampal dependent memory (Rodgers et al., 2010).  
416 Future work should thoroughly examine the mechanisms through which ER $\alpha$  can influence  
417 hippocampal function in the absence of circulating estrogens, though previous work from our lab  
418 indicates a role for brain-derived neuroestrogens (Baumgartner et al., 2019) as well as ligand-  
419 independent activation of ER $\alpha$  by growth factors including insulin-like growth factor-1 (IGF-1)  
420 (Grissom and Daniel, 2016; Witty et al., 2013).

421 Ultimately these findings have important implications for women who use short-term  
422 estrogen treatment to treat their menopause symptoms. Several studies, including those of  
423 women who underwent surgical menopause earlier in life than natural menopause (Bove et al.,  
424 2014; Rocca et al., 2014), suggest a lasting benefit for cognition of short-term estrogen use  
425 immediately following menopause (Bagger et al., 2005; Whitmer et al., 2011). Ongoing large-  
426 scale clinical studies such as the Kronos Early Estrogen Prevention Study (KEEPS) will provide  
427 more insight into the long-term impacts of short-term estrogen use in midlife (Wharton et al.,  
428 2013). The results of the current study suggest a potential mechanism for short-term midlife  
429 estrogen use to have lasting impacts on cognition by maintaining transcriptional activity of  
430 nuclear ER $\alpha$  in the hippocampus. Furthermore, these findings emphasize the critical impact that  
431 ER $\alpha$  can have on the aging female brain in the absence of circulating estrogens.

432 **5. References**

- 433 Akama, K., McEwen, B., 2003. Estrogen stimulates postsynaptic density-95 rapid protein  
434 synthesis via the Akt/protein kinase B pathway. *J Neurosci* 23(6), 2333-2339.
- 435 Bagger, Y., Tankó, L., Alexandersen, P., Qin, G., Christiansen, C., 2005. Early postmenopausal  
436 hormone therapy may prevent cognitive impairment later in life. *Menopause* 12(1), 12-17.
- 437 Baumgartner, N., Grissom, E., Pollard, K., McQuillen, S., Daniel, J., 2019. Neuroestrogen-  
438 Dependent Transcriptional Activity in the Brains of ERE-Luciferase Reporter Mice following  
439 Short- and Long-Term Ovariectomy. *eNeuro* 6(5), ENEURO.0275-0219.2019.
- 440 Baxter, M., Santistevan, A., Bliss-Moreau, E., Morrison, J., 2018. Timing of cyclic estradiol  
441 treatment differentially affects cognition in aged female rhesus monkeys. *Beh Neurosci* 132(4),  
442 213-223.
- 443 Berchtold, N., Kesslak, J., Pike, C., Adlard, P., Cotman, C., 2001. Estrogen and exercise  
444 interact to regulate brain-derived neurotrophic factor mRNA and protein expression in the  
445 hippocampus. *European Journal of Neuroscience* 14(12), 1992-2002.
- 446 Bi, R., Foy, M., Thompson, R., Baudry, M., 2003. Effects of estrogen, age, and calpain on MAP  
447 kinase and NMDA receptors in female rat brain. *Neurobiol Aging* 24, 977-983.
- 448 Black, K.L., Baumgartner, N.E., Daniel, J.M., 2018. Lasting impact on memory of midlife  
449 exposure to exogenous and endogenous estrogens. *Behav. Neurosci.* 132(6), 547-551.
- 450 Black, K.L., Witty, C.F., Daniel, J.M., 2016. Previous Midlife Oestradiol Treatment Results in  
451 Long-Term Maintenance of Hippocampal Oestrogen Receptor alpha Levels in Ovariectomised  
452 Rats: Mechanisms and Implications for Memory. *J Neuroendocrinol* 28(10).
- 453 Bohacek, J., Daniel, J.M., 2007. Increased daily handling of ovariectomized rats enhances  
454 performance on a radial-maze task and obscures effects of estradiol replacement. *Horm Behav*  
455 52(2), 237-243.
- 456 Bove, R., Secor, E., Chibnik, L., Barnes, L., Schneider, J., Bennett, D., De Jager, P., 2014. Age  
457 at surgical menopause influences cognitive decline and Alzheimer pathology in older women.

458 Neurology 82(3), 222-229.

459 Castles, C., Oesterreich, S., Hansen, R., Fugua, S., 1997. Auto-regulation of the estrogen  
460 receptor promoter. *Ster Biochem Mol Bio* 62(2-3), 155-163.

461 Cavus, I., Duman, R., 2003. Influence of estradiol, stress, and 5-HT<sub>2A</sub> agonist treatment on  
462 brain-derived neurotrophic factor expression in female rats. *Biol. Psychiatry* 54(1), 59-69.

463 Chen, W., Manson, J., Hankinson, S., Rosner, B., Holmes, M., Willett, W., Colditz, G., 2006.  
464 Unopposed estrogen therapy and the risk of invasive breast cancer. *Arch Intern Med* 166, 1027-  
465 1032.

466 Daniel, J.M., Witty, C.F., Rodgers, S.P., 2015. Long-term consequences of estrogens  
467 administered in midlife on female cognitive aging. *Horm Behav* 74, 77-85.

468 Fan, M., Park, A., Nephew, K., 2005. CHIP (carboxyl terminus of Hsc70-interacting protein)  
469 promotes basal and geldanamycin-induced degradation of estrogen receptor-alpha. *Mol*  
470 *Endocrinol* 19(12), 2901-2914.

471 Foster, T., 2012. Role of Estrogen Receptor Alpha and Beta Expression and Signaling on  
472 Cognitive Function During Aging. *Hippocampus* 22(4), 656–669.

473 Foy, M., Baudry, M., Foy, J., Thompson, R., 2008. 17beta-estradiol modifies stress-induced and  
474 age-related changes in hippocampal synaptic plasticity. *Behav Neurosci* 122(2), 301-309.

475 Fugger, H., Kumar, A., Lubahn, D., Korach, K., Foster, T., 2001. Examination of estradiol effects  
476 on the rapid estradiol mediated increase in hippocampal synaptic transmission in estrogen  
477 receptor alpha knockout mice. *Neurosci Lett* 309(3), 207-209.

478 Gabor, R., Nagle, R., Johnson, D., Gibbs, R., 2003. Estrogen enhances potassium-stimulated  
479 acetylcholine release in the rat hippocampus. *Brain Res* 962(1), 244-247.

480 Gibbs, R., 1996. Fluctuations in relative levels of choline acetyltransferase mRNA in different  
481 regions of the rat basal forebrain across the estrous cycle: effects of estrogen and  
482 progesterone. *J Neuro* 16(3), 1049–1055.

483 Gibbs, R., 1997. Effects of estrogen on basal forebrain cholinergic neurons vary as a function of

484 dose and duration of treatment. *Brain Research* 757(1), 10-16.

485 Gibbs, R., 1999. Treatment with estrogen and progesterone affects relative levels of brain-  
486 derived neurotrophic factor mRNA and protein in different regions of the adult rat brain. *Brain*  
487 *Research* 844(1-2), 20-27.

488 Grissom, E.M., Daniel, J.M., 2016. Evidence for Ligand-Independent Activation of Hippocampal  
489 Estrogen Receptor-alpha by IGF-1 in Hippocampus of Ovariectomized Rats. *Endocrinology*  
490 157(8), 3149-3156.

491 Hyder, S., Chiappetta, C., Stancel, G., 1999. Interaction of human estrogen receptors alpha and  
492 beta with the same naturally occurring estrogen response elements. *Biochem Pharmacol* 57(6),  
493 597-601.

494 Klinge, C., 2001. Estrogen receptor interaction with estrogen response elements. *Nucleic Acids*  
495 *Res* 29(14), 2905-2919.

496 Koebele, S.V., Bimonte-Nelson, H.A., 2017. The endocrine-brain-aging triad where many paths  
497 meet: female reproductive hormone changes at midlife and their influence on circuits important  
498 for learning and memory. *Exp Gerontol* 94, 14-23.

499 Kőszegi, Z., Szego, É., Cheong, R., Tolod-Kemp, E., Ábrahám, I., 2011. Postlesion Estradiol  
500 Treatment Increases Cortical Cholinergic Innervations via Estrogen Receptor- $\alpha$  Dependent  
501 Nonclassical Estrogen Signaling *in Vivo*. *Endocrinology* 152(9), 3471-3482.

502 Kumar, A., Foster, T., 2002. 17 $\beta$ -estradiol benzoate decreases the AHP amplitude in CA1  
503 pyramidal neurons. *J Neurophysiol* 88(2), 621-626.

504 Liu, Y., Fowler, C., Young, L., Yan, Q., Insel, T., Wang, Z., 2001. Expression and estrogen  
505 regulation of brain-derived neurotrophic factor gene and protein in the forebrain of female prairie  
506 voles. *J Comp Neuro* 433(4), 499-514.

507 Luine, V., 1985. Estradiol increases choline acetyltransferase activity in specific basal forebrain  
508 nuclei and projection areas of female rats. *Exp Neurol* 89(2), 484-490.

509 Luine, V., Frankfurt, M., 2020. Estrogenic regulation of memory: The first 50 years. *Hormones*

510 and Behavior 121, 104711.

511 Ma, S., Tang, N., Leung, G., Fung, A., Lam, L., 2014. Estrogen receptor  $\alpha$  polymorphisms and  
512 the risk of cognitive decline: A 2-year follow-up study. *Am J Geriatr Psychiatry*. 22(5), 489-498.

513 Ma, S., Tang, N., Tam, C., Lui, V., Lau, E., Zhang, Y., Chiu, H., Lam, L., 2009. Polymorphisms  
514 of the estrogen receptor alpha (ESR1) gene and the risk of Alzheimer's disease in a southern  
515 Chinese community. *Int Psychogeriatr*. 21(5), 977-986.

516 Maki, P., Dennerstein, L., Clark, M., Guthrie, J., LaMontagne, P., Fornelli, D., Little, D.,  
517 Henderson, V., Resnick, S., 2011. Perimenopausal use of hormone therapy is associated with  
518 enhanced memory and hippocampal function later in life. *Brain Research* 1379, 232-243.

519 Murakami, G., Hojo, Y., Ogiue-Ikeda, M., Mukai, H., Chambon, P., Nakajima, K., Ooishi, Y.,  
520 Kimoto, T., Kawato, S., 2015. Estrogen receptor KO mice study on rapid modulation of spines  
521 and long-term depression in the hippocampus. *Brain Res* 1621, 133-146.

522 Nelson, B., Springer, R., Daniel, J., 2014. Antagonism of brain insulin-like growth factor-1  
523 receptors blocks estradiol effects on memory and levels of hippocampal synaptic proteins in  
524 ovariectomized rats. *Psychopharmacology (Berl)* 231(5), 899–907.

525 Pencea, V., Bingaman, K., Wiegand, S., Luskin, M., 2001. Infusion of brain-derived neurotrophic  
526 factor into the lateral ventricle of the adult rat leads to new neurons in the parenchyma of the  
527 striatum, septum, thalamus, and hypothalamus. *J Neurosci* 21(17), 6706-6717.

528 Pollard, K.J., Wartman, H.D., Daniel, J.M., 2018. Previous estradiol treatment in ovariectomized  
529 mice provides lasting enhancement of memory and brain estrogen receptor activity. *Horm*  
530 *Behav* 102, 76-84.

531 Rocca, W., Grossardt, B., Shuster, L., 2014. Oophorectomy, estrogen, and dementia: a 2014  
532 update. *Mol Cell Endocrinol* 389(1-2), 7-12.

533 Rodgers, S.P., Bohacek, J., Daniel, J.M., 2010. Transient estradiol exposure during middle age  
534 in ovariectomized rats exerts lasting effects on cognitive function and the hippocampus.  
535 *Endocrinology* 151(3), 1194-1203.

536 Ryan, J., Carrière, I., Carcaillon, L., Dartigues, J., Auriacombe, S., Rouaud, O., Berr, C., Ritchie,  
537 K., Scarabin, P., Ancelin, M., 2014. Estrogen receptor polymorphisms and incident dementia:  
538 the prospective 3C study. *Alzheimers Dement* 10(1), 27-35.

539 Santen, R., Allred, D., Ardoin, S., Archer, D., Boyd, N., Braunstein, G., Burger, H., Colditz, G.,  
540 Davis, S., Gambacciani, M., Gower, B., Henderson, V., Jarjour, W., Karas, R., Kleerekoper, M.,  
541 Lobo, R., Manson, J., Marsden, J., Martin, K., Martin, L., Pinkerton, J., Rubinow, D., Teede, H.,  
542 Thiboutot, D., Utian, W., 2010. Postmenopausal hormone therapy: An endocrine society  
543 scientific statement. *Clin Endocrinol Metab* 95, s1–s66.

544 Scharfman, H., MacLuskey, N., 2005. Similarities between actions of estrogen and BDNF in the  
545 hippocampus: coincidence or clue? *Trends in Neurosci* 28(2).

546 Singh, M., Meyer, E., Simpkins, J., 2005. The effect of ovariectomy and estradiol replacement  
547 on brain-derived neurotrophic factor messenger ribonucleic acid expression in cortical and  
548 hippocampal brain regions of female Sprague-Dawley rats. *Endocrinology* 136(5).

549 Sohrabji, F., Lewis, D., 2006. Estrogen-BDNF interactions: implications for neurodegenerative  
550 diseases. *Front Neuroendocrinol* 27(4), 404-414.

551 Sohrabji, F., Miranda, R., Toran-Allerand, C., 1995. Identification of a putative estrogen  
552 response element in the gene encoding brain-derived neurotrophic factor. *Proc Nat Acad Sci*  
553 *USA* 92(24), 11110–11114.

554 Tateishi, Y., Kawabe, Y., Chiba, T., Murata, S., Ichikawa, K., Murayama, A., Tanaka, K., Baba,  
555 T., Kato, S., Yanagisawa, J., 2004. Ligand-dependent switching of ubiquitin-proteasome  
556 pathways for estrogen receptor. *EMBO J* 23(24), 4813-4823.

557 Waters, E., Mitterling, K., JL, S., Mazid, S., McEwen, B., Milner, T., 2009. Estrogen receptor  
558 alpha and beta specific agonists regulate expression of synaptic proteins in rat hippocampus.  
559 *Brain Res* 1290, 1-11.

560 Wharton, W., Gleason, C., Miller, V., Asthana, S., 2013. Rationale and design of the Kronos  
561 Early Estrogen Prevention Study (KEEPS) and the KEEPS Cognitive and Affective sub study

562 (KEEPS Cog). *Brain Res* 1514, 12-17.

563 Whitmer, R., Quesenberry, C., Zhou, J., Yaffe, K., 2011. Timing of hormone therapy and  
564 dementia: the critical window theory revisited. *Ann Neurol* 69(1), 163-169.

565 Witty, C., Foster, T., Semple-Rowland, S., Daniel, J., 2012. Increasing hippocampal estrogen  
566 receptor alpha levels via viral vectors increases MAP kinase activation and enhances memory  
567 in aging rats in the absence of ovarian estrogens. *PLoS One* 7(12), e51385.

568 Witty, C., Gardella, L., Perez, M., Daniel, J., 2013. Short-term estradiol administration in aging  
569 ovariectomized rats provides lasting benefits for memory and the hippocampus: a role for  
570 insulin-like growth factor-I. *Endocrinology* 154(2), 842-852.

571 Yaffe, K., Lindquist, K., Sen, S., Cauley, J., Ferrell, R., Penninx, B., Harris, T., Li, R., Cummings,  
572 S., 2009. Estrogen receptor genotype and risk of cognitive impairment in elders: findings from  
573 the Health ABC study. *Neurobiol Aging* 30(4), 607–614.

574 Zhang, Q.G., Han, D., Wang, R.M., Dong, Y., Yang, F., Vadlamudi, R.K., Brann, D.W., 2011. C  
575 terminus of Hsc70-interacting protein (CHIP)-mediated degradation of hippocampal estrogen  
576 receptor-alpha and the critical period hypothesis of estrogen neuroprotection. *Proc Natl Acad*  
577 *Sci USA* 108(35), E617-624.

578 Zhou, J., Zhang, H., Cohen, R., Pandey, S., 2005. Effects of estrogen treatment on expression  
579 of brain-derived neurotrophic factor and cAMP response element-binding protein expression  
580 and phosphorylation in rat amygdaloid and hippocampal structures. *Neuroendocrinology* 81(5),  
581 294-310.

582



583 **FIGURES**

584

585 **Figure 1.**

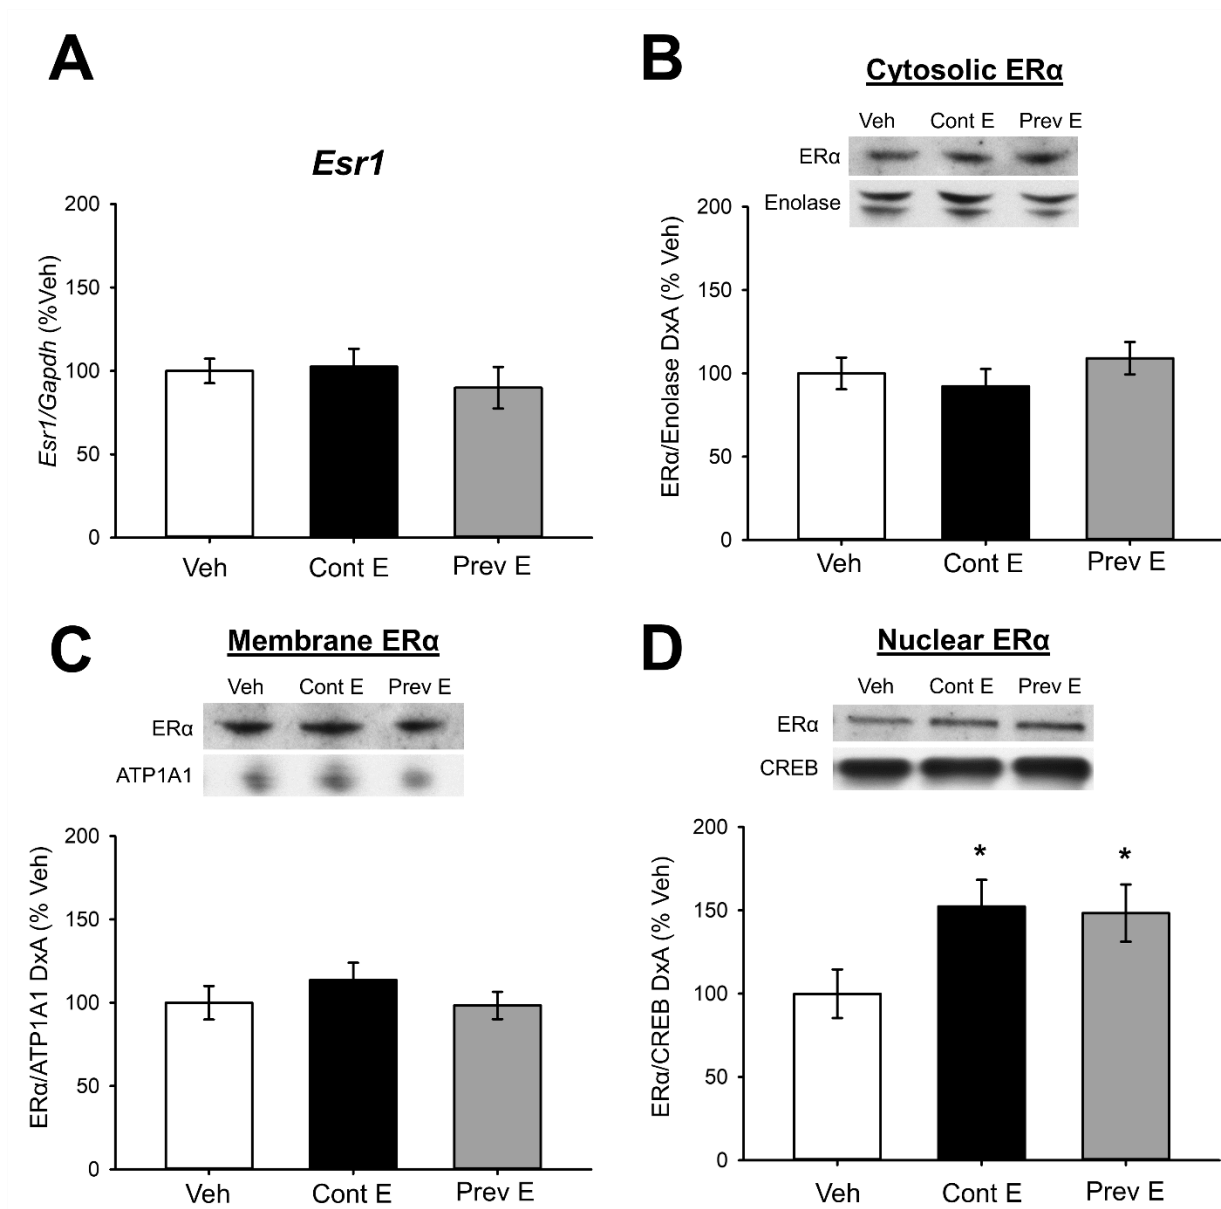

586

587 **Figure 2**

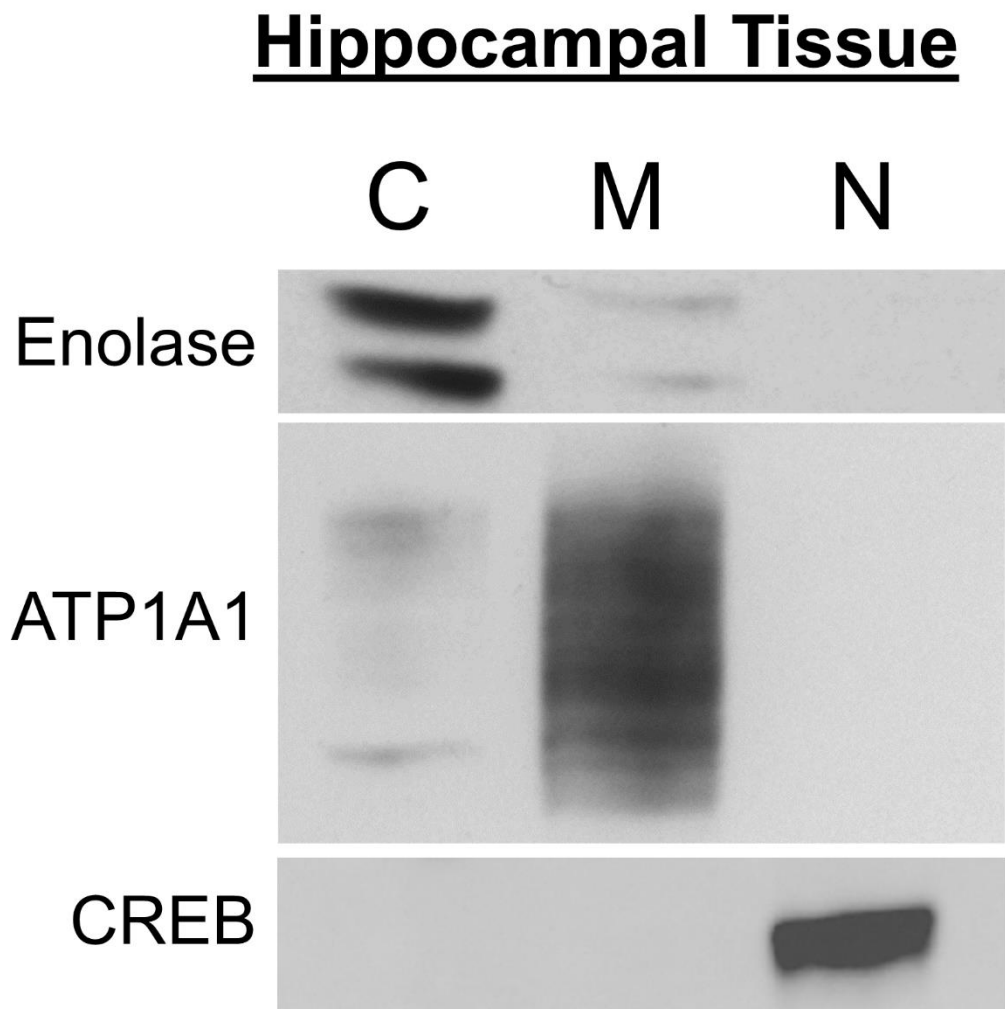

588

589 **Figure 3**

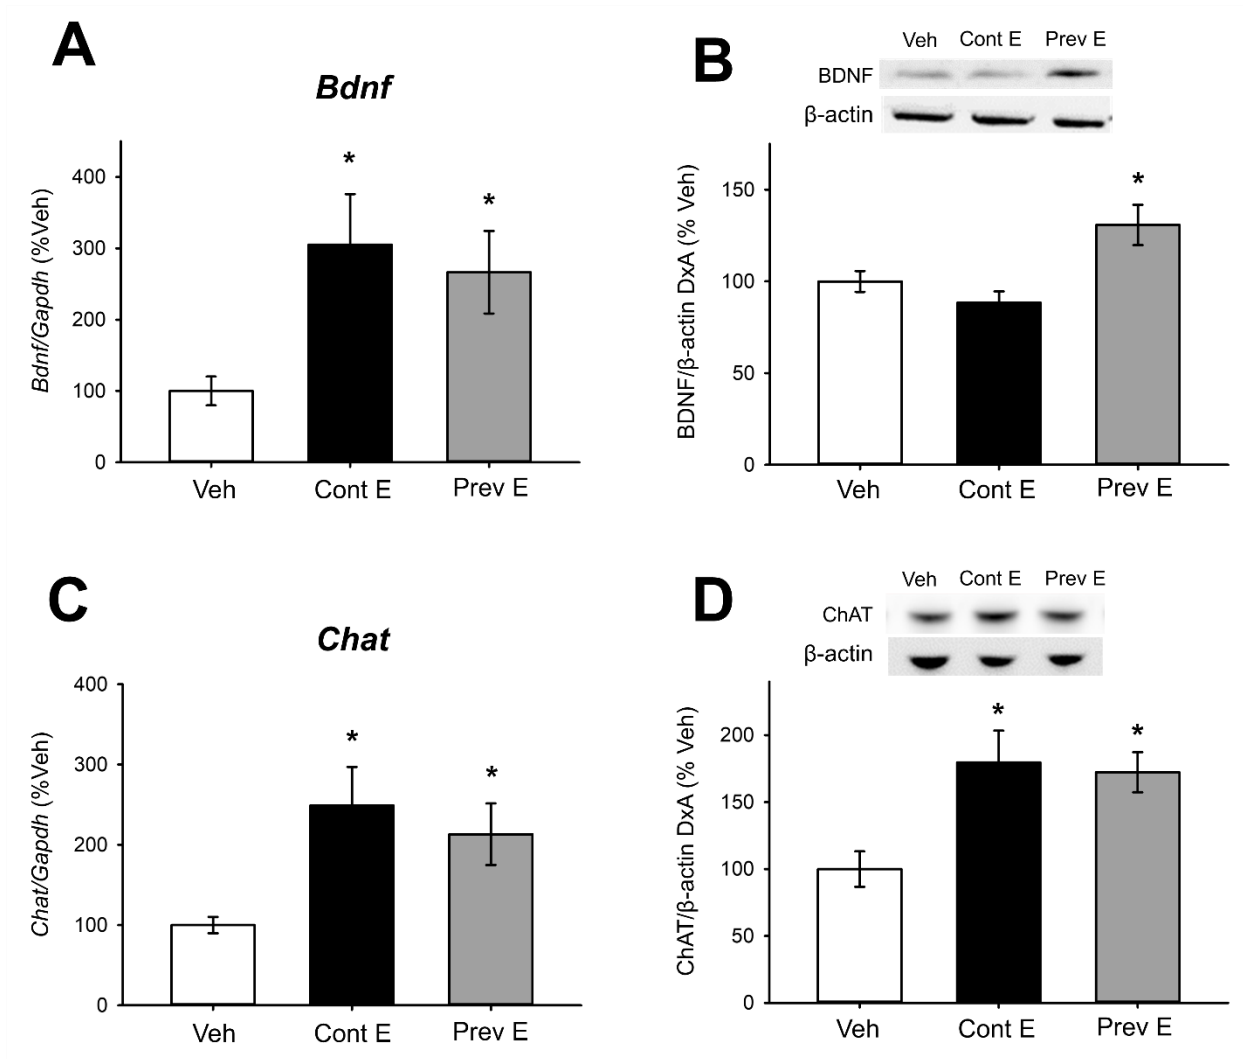

590

591 **Figure 4**

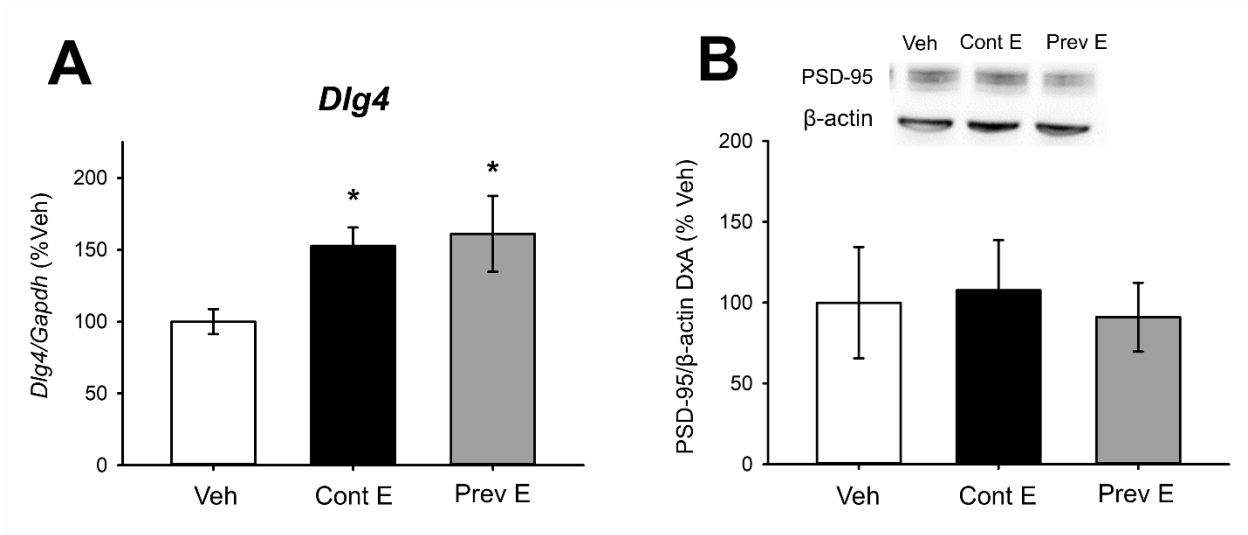

592

593 **FIGURE LEGENDS**

594 **Figure 1.** *Transcriptional Regulation of *Esr1* and subcellular localization of ER $\alpha$  in the*  
595 *hippocampus of ovariectomized rats following continuous or previous exposure to estradiol in*  
596 *midlife.* Middle-aged female rats were ovariectomized and treated to one of three hormone  
597 conditions via Silastic capsule: Vehicle (Veh), which received a vehicle capsule; Continuous  
598 Estradiol (Cont E), which received an estradiol capsule for the duration of the experiment; or  
599 Previous Estradiol (Prev E), which received an estradiol capsule for 40 days followed by a  
600 vehicle capsule for the duration of the experiment. One month later, hippocampi were  
601 processed for either RNA extraction and RT-PCR using primers for *Esr1* and housekeeping  
602 gene *Gapdh* or for subcellular fractionation and western blotting for ER $\alpha$ , measured by density x  
603 area of ER $\alpha$ /loading control proteins. A) There was no significant effect of hormone treatment on  
604 *Esr1* expression in the hippocampus relative to *Gapdh* expression. B-C) There was no  
605 significant effect of hormone treatment on cytosolic (B) or membrane (C) ER $\alpha$ . D) There was a  
606 significant effect of hormone treatment on levels of nuclear ER $\alpha$ . Post hoc testing revealed  
607 increased levels in the Cont E and Prev E groups relative to the Veh group. Data are presented  
608 as means  $\pm$  SEM normalized to percent Vehicle group. \* $p < .05$  vs. Veh

609 **Figure 2.** *Verification of subcellular compartment fractionation.* Hippocampal tissue was  
610 processed for subcellular fractionation in order to separate the cytosolic, membrane, and  
611 nuclear compartments of cells via consecutive centrifugation steps using a commercially  
612 available kit. Compartment separation was verified using western blotting for cytosolic marker  
613 enolase, membrane marker ATP1A1, and nuclear marker CREB on samples from all  
614 compartments.

615 **Figure 3.** *Hippocampal transcriptional regulation and protein expression of genes that contain*  
616 *ERE sequences following continuous or previous midlife estradiol exposure.* Middle-aged  
617 female rats were ovariectomized and treated to one of three hormone conditions via Silastic  
618 capsule: Vehicle (Veh), which received a vehicle capsule; Continuous Estradiol (Cont E), which

619 received an estradiol capsule for the duration of the experiment; or Previous Estradiol (Prev E),  
620 which received an estradiol capsule for 40 days followed by a vehicle capsule for the duration of  
621 the experiment. One month later, hippocampi were processed for RNA extraction and RT-PCR  
622 using primers for *Bdnf*, *Chat*, and *Gapdh*, or for western blotting for BDNF, ChAT, and  $\beta$ -actin.  
623 RT-PCR data were normalized to housekeeping gene *Gapdh* and western blot data were  
624 normalized to loading control protein  $\beta$ -actin. A-B) There was a significant effect of hormone  
625 treatment on *Bdnf* RNA expression (A) and BDNF protein levels (B) in the hippocampus. Post  
626 hoc testing revealed increased *Bdnf* expression in the Cont E and Prev E groups and increased  
627 BDNF protein levels in the Prev E group as compared to the Veh group. C-D) There was a  
628 significant effect of hormone treatment on *Chat* RNA expression (C) and ChAT protein levels  
629 (D) in the hippocampus. Post hoc testing revealed increased *Chat* expression and increased  
630 ChAT protein levels in the Cont E and Prev E groups as compared to the Veh group. \* $p < .05$  vs.  
631 Veh

632 **Figure 4.** *Hippocampal transcriptional regulation and protein expression of gene that does not*  
633 *contain an ERE sequence following continuous or previous midlife estradiol exposure.* Middle-  
634 aged female rats were ovariectomized and treated to one of three hormone conditions via  
635 Silastic capsule: Vehicle (Veh), which received a vehicle capsule; Continuous Estradiol (Cont  
636 E), which received an estradiol capsule for the duration of the experiment; or Previous Estradiol  
637 (Prev E), which received an estradiol capsule for 40 days followed by a vehicle capsule for the  
638 duration of the experiment. One month later, hippocampi were processed for RNA extraction  
639 and RT-PCR using primers for *Dlg4* and *Gapdh*, or for western blotting for PSD-95 and  $\beta$ -actin.  
640 RT-PCR data were normalized to housekeeping gene *Gapdh* and western blot data were  
641 normalized to loading control protein  $\beta$ -actin. A) There was a significant effect of hormone  
642 treatment on *Dlg4* RNA expression in the hippocampus. Post hoc testing revealed increased  
643 *Dlg4* expression in the Cont E and Prev E groups as compared to the Veh group. B) There was  
644 no effect of hormone treatment on PSD-95 protein levels. \* $p < .05$  vs. Veh
